# Supplementary material
Source: publisher figshare collection journal article supplement (https://acs.figshare.com/ndownloader/files/7402204)
Supplement: Supplementary file 1 [file 7402204]

---

## Supporting Information

### **Photo-induced Terahertz Conductivity and Carrier Relaxation in Thermal-reduced Multilayer Graphene Oxide Films**

Xiao Xing<sup>1</sup>, Litao Zhao<sup>2</sup>, Zeyu Zhang<sup>1</sup>, Liang Fang<sup>1</sup>, Zhengfu Fan<sup>1</sup>, Xiumei Liu<sup>1</sup>,  
Xian Lin<sup>1</sup>, Jianhua Xu<sup>2</sup>, Jinquan Chen<sup>2</sup>, Xinluo Zhao<sup>1</sup>, Zuanming Jin<sup>1\*</sup> and Guohong  
Ma<sup>1\*</sup>

<sup>1</sup>*Department of physics, Shanghai Universtiy, 99 Shangda Road, Shanghai 200444, P.  
R. China*

<sup>2</sup>*State Key Laboratory of Precision Spectroscopy, East China Normal University,  
Shanghai, 200062, China*

**Photoinduced conductivity of RGO films annealed at four different temperatures with several pump fluences, F**

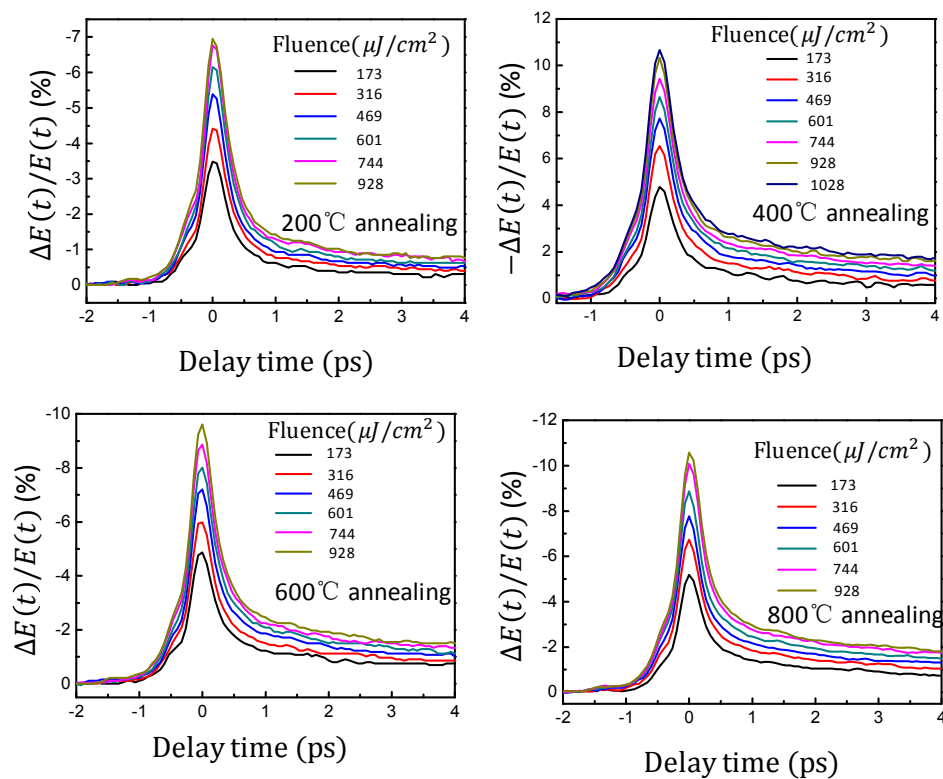

Figure S1 Photo-excited transient THz transmission response of multilayer RGO film annealed at different temperatures (200°C 400 °C 600°C 800°C) with several fluence, F.

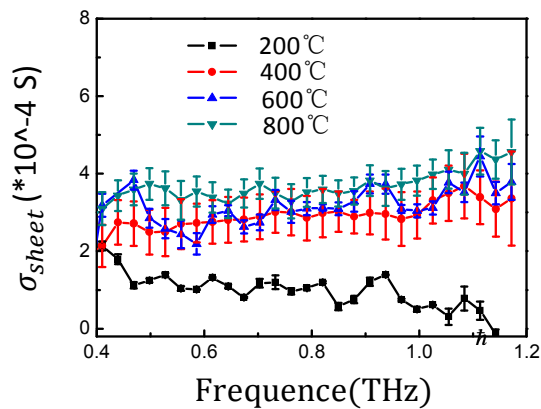

Figure S2 The real parts of the static conductivity of the multilayer RGO films at THz frequencies extracted from the amplitude and phase of relative THz-TDS transmission.

According to the intrinsic conductivity of the four RGO samples in Figure S2, we can rough estimate the  $|E_F|$  by  $\sigma_{DC} = \frac{\tau E_F e^2}{\pi \hbar^2} \sqrt{N}$ , ( $N$  is the number of layers). Here we assume the momentum scattering time  $\tau$  remains the same as that without pump excitation. Expect for the RGO sample annealed at 200 °C, all other three samples show a shorter momentum scattering time at higher annealing temperature (just as shown in table 1). This may be on account of that the RGO film annealed at 200 °C is affected more by the oxygen defects. As the intrinsic conductivity shifts from  $0.9 \times 10^{-4} S$  to  $3.69 \times 10^{-4} S$  with the annealing temperature increases, also the scattering time  $\tau$  decrease at higher annealing temperature, and  $|E_F|$  turns larger as the annealing temperature increases. The magnitude of  $|E_F|$  can be tuned by the annealing temperature, i.e.  $|E_F|$  increases with increasing the annealing temperature.

On the other hand, photoconductivity,  $\Delta\sigma$  is related to electron temperature  $T_e$  by <sup>[1]</sup>

$$\Delta\sigma = \sigma_{\text{intra}}(T_e) - \sigma_{\text{intra}}(T_0), \quad \sigma_{\text{intra}}(T) = \frac{2G_0\tau k_B T}{\hbar(\omega^2\tau^2 + 1)} \ln[2\cosh(\frac{E_F}{2k_B T})], \quad (1)$$

Here, the lattice temperature  $T_0 = 300$  K,  $\tau$  is obtained from fitting frequency dependence of the dynamical photoconductivity. The electron temperature ( $T_e$ ) therefore can be determined by the photoinduced conductivity ( $\Delta\sigma$ ).

For the Supercollision (SC) mechanism the rate equation governing the cooling of the electron temperature is given by <sup>[2]</sup>

$$T_{el}(t) = \frac{T_{el,0}}{1 + (A/\alpha)(t - t_0)T_{el,0}} \quad (2)$$

Here  $T_{el,0}$  is the initial temperature,  $A/\alpha$  is the SC rate coefficient. If the Fermi level  $|E_F|$  is smaller than  $2K_B T$  (at room temperature),  $\Delta\sigma \sim T_{el}$ . Therefore, the dynamics of photo-induced conductivity can be fitted by Eq (2), as shown in the Figures below. The best fit is obtained with the fitting parameter of  $A/\alpha = 6.3 \sim 7.8 \times 10^8 \text{ K}^{-1}\text{s}^{-1}$ , which is very close to the reported rate coefficient for the suspended graphene ( $A/\alpha = 5.5 \times 10^8 \text{ K}^{-1}\text{s}^{-1}$ ) <sup>[3]</sup> and chemical reduced graphene oxide ( $A/\alpha = 2.6 \times 10^8 \text{ K}^{-1}\text{s}^{-1}$ ) <sup>[1]</sup>. We find  $A/\alpha$  is independent on the annealing temperature. Predicted by the SC model,  $\tau = [(A/\alpha)T_0]^{-1}$  ( $T_0$  is the initial electron temperature),

the cooling time ( $\tau$ ) is independent on the annealing temperature in the case of similar electron temperature ( $T_0$ ), as shown in Fig.S3.

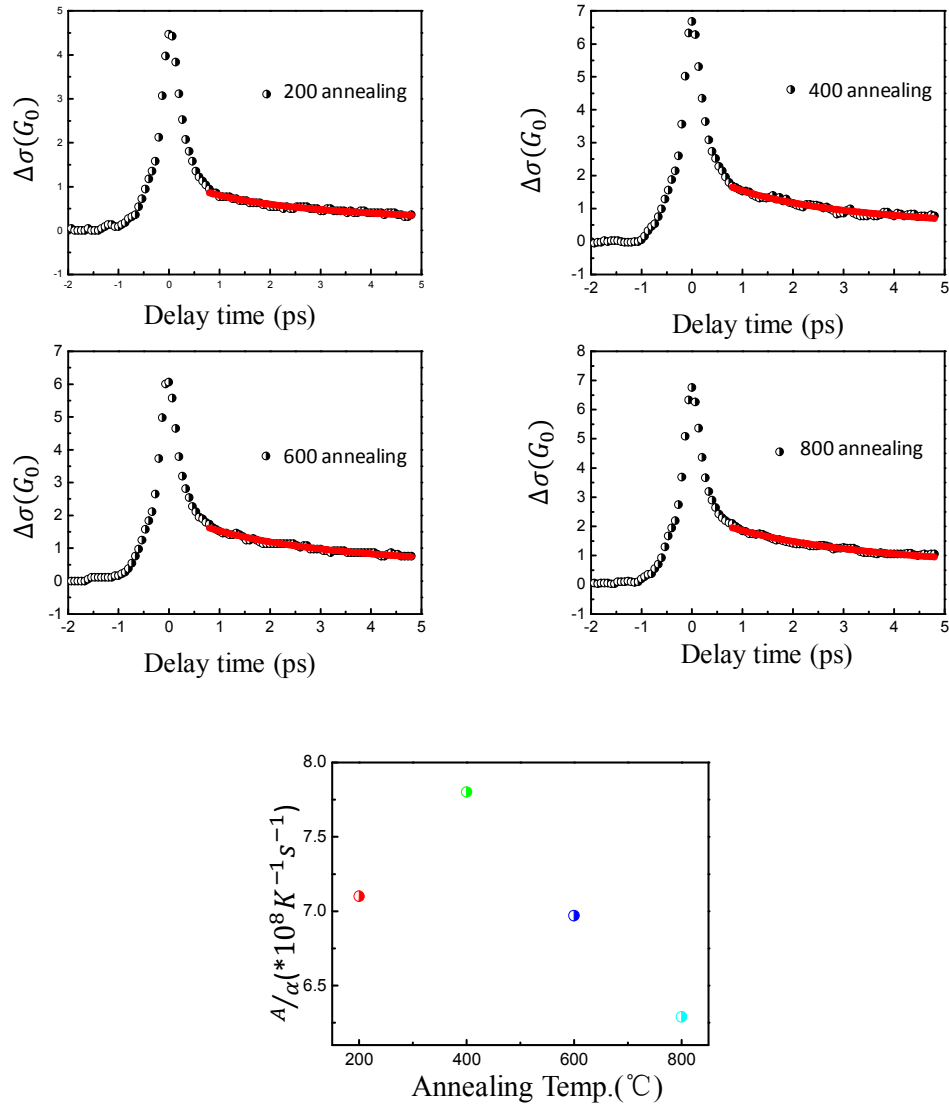

Figure S3 The SC rate coefficient with the RGO samples at four annealing temperatures

#### References:

- (1) Kar, S.; Jayanthi, S.; Freysz, E.; Sood, A. K. Time Resolved Terahertz Spectroscopy of Low Frequency Electronic Resonances and Optical Pump-Induced Terahertz Photoconductivity in Reduced Graphene Oxide Membrane. *Carbon* **2014**, *80*, 762-770.
- (2) Song, J. C. W.; Reizer, M. Y.; Levitov, L. S. Disorder-Assisted Electron-Phonon Scattering and Cooling Pathways in Graphene. *Phys. Rev. Lett.* **2012**, *109*, 106602.
- (3) Graham, M. W.; Shi, S.-F.; Ralph, D. C.; Park, J.; McEuen, P. L.

---

Photocurrent Measurements of Supercollision Cooling in Graphene. *Nat. Phys.* **2013**, *9*, 103-108.
